# Supplementary material
Source: MDPI journal article supplement (https://www.mdpi.com/2218-1989/12/4/363)
Supplement: s1 [file s1]

Archive with 1 entries (1 files):
- 1.pdf
